# Supplementary material
Source: PubMed Central journal article supplement (PMC5338738)
Supplement: NIHMS850255-supplement-Supplemental.pdf [file NIHMS850255-supplement-Supplemental.pdf]

## Supporting Information

### Environmental Costs of Leaded Aviation Gasoline

Philip J. Wolfe<sup>1\*</sup>, Amanda Giang<sup>2</sup>, Akshay Ashok<sup>1</sup>, Noelle E. Selin<sup>2,3</sup>, Steven R. H. Barrett<sup>1</sup>

\*Corresponding author ([pwolfe@mit.edu](mailto:pwolfe@mit.edu), tel: +1-617-253-2727, fax: +1-617-324-0096)

<sup>1</sup> Laboratory for Aviation and the Environment, Massachusetts Institute of Technology, 77 Massachusetts Avenue, Cambridge, MA, USA

<sup>2</sup> Institute for Data, Systems, and Society, Massachusetts Institute of Technology, 77 Massachusetts Avenue, Cambridge, MA, USA

<sup>3</sup> Department of Earth, Atmospheric, and Planetary Sciences, Massachusetts Institute of Technology, 77 Massachusetts Avenue, Cambridge, MA, USA.

Number of pages: 12

Number of figures: 5

Number of tables: 3

## **Aviation Inventory Description**

Landing and Takeoff (LTO) lead emissions were taken from the 2008 EPA National Emissions Inventory (NEI). Lead emissions are provided as annual total emissions at nearly 20,000 airport or airfield facilities and were calculated for the 2008 NEI by assuming a fuel lead content of 2.12 g Pb/g and a 5% retention of lead in the engine oil/exhaust system.<sup>1</sup> Emissions outside the continental United States, including 4.8 tons of emissions in Alaska, were discarded as they occur outside the domain of the air quality model. LTO emissions are geo-located by airport center and are averaged over the CMAQ grid-cell containing the airport center. The altitudinal distribution of non-LTO phases of GA flights is heterogeneous and can occur both above and below the mixing height depending on the flight purpose. Non-LTO lead emissions are distributed over all cells in the state of the originating flight, with altitudinal, diurnal, and seasonal distributions applied as described in the main text. The seasonal distribution is applied on a monthly basis nationwide based on the results of the average temporal patterns of General Aviation across the country.<sup>2</sup> This distribution will likely overestimate the seasonality of operations in some regions and underestimate the seasonality of operations in others. Figure S1 shows the national average monthly distribution of operations as applied in this study and compares it to two locations with low and high seasonal heterogeneity.

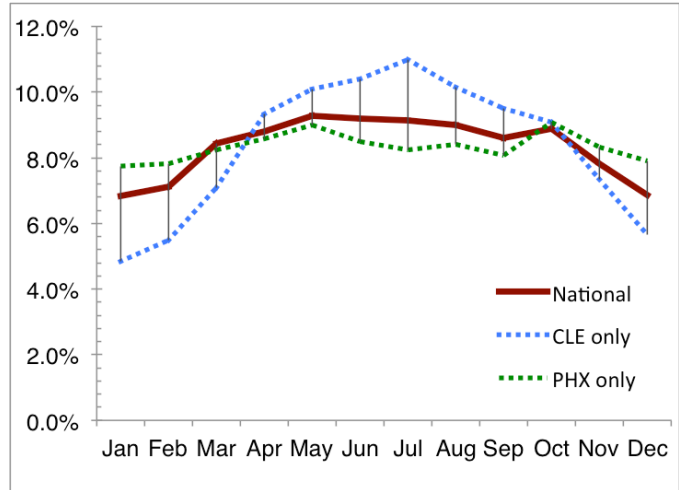

**Figure S1.** Seasonal distribution of General Aviation operations.

**Figure S2** shows the spatial distribution of the yearly total aviation lead emissions (LTO and full-flight emissions). Lead emission totals are the summed annual emissions across all altitude layers and include both LTO and cruise phase emissions.

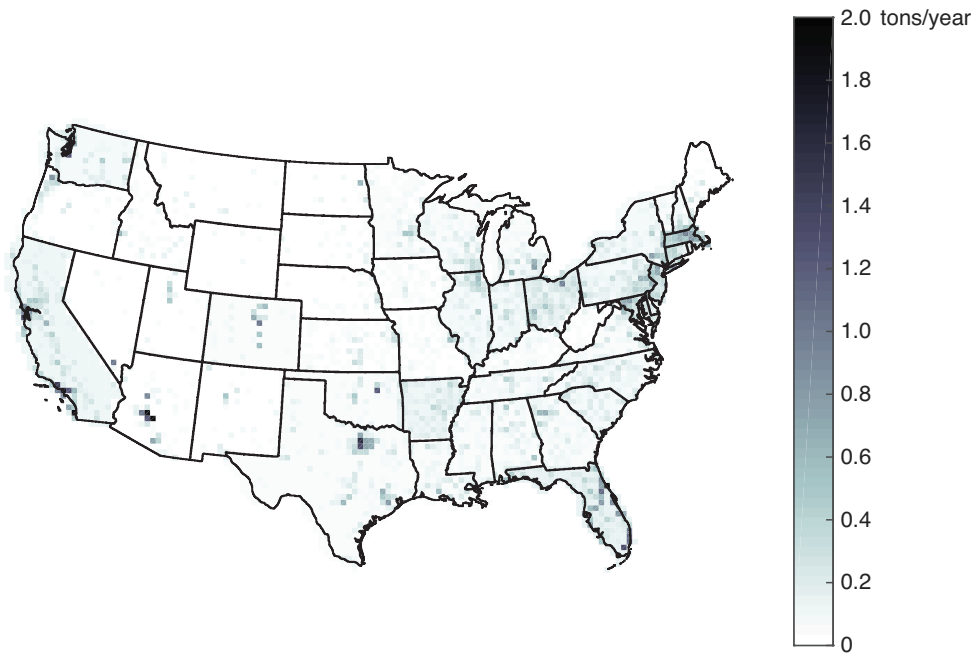

**Figure S2.** Map indicating the location of aviation lead emissions across the continental United States.

## CMAQ Description

The vertical domain is discretized into 34 layers by pressure levels according to the sigma coordinate system from the surface of the earth up to the 100 millibar pressure level (corresponding to an altitude of approximately 52,000ft or 16km). The vertical grid is terrain-following (i.e. the first grid box is always on the surface). The first 3000ft in altitude are represented by 13 layers with grid box heights ranging between 38-167m.

**Table S1.** Vertical Layers in the CMAQ modeling domain.

| Layer | Sigma Coordinate | Pressure(mb) | Height above ground(m) |
|-------|------------------|--------------|------------------------|
| 34    | 0.000            | 100          | 15668.0                |
| 33    | 0.05             | 145.6        | 13664.8                |
| 32    | 0.10             | 191.3        | 12080.6                |
| 31    | 0.15             | 237          | 10759.7                |
| 30    | 0.20             | 282.6        | 9621.2                 |
| 29    | 0.25             | 328.3        | 8617.3                 |
| 28    | 0.30             | 374          | 7717.4                 |
| 27    | 0.35             | 419.6        | 6900.4                 |
| 26    | 0.40             | 465.3        | 6151.2                 |
| 25    | 0.45             | 511.0        | 5458.5                 |
| 24    | 0.50             | 556.6        | 4813.9                 |
| 23    | 0.55             | 602.3        | 4210.5                 |
| 22    | 0.60             | 647.9        | 3643.1                 |
| 21    | 0.65             | 693.6        | 3107.2                 |
| 20    | 0.70             | 739.3        | 2599.3                 |
| 19    | 0.74             | 775.8        | 2211.1                 |
| 18    | 0.77             | 803.2        | 1929.7                 |
| 17    | 0.80             | 830.6        | 1656.0                 |
| 16    | 0.82             | 848.9        | 1477.6                 |
| 15    | 0.84             | 867.1        | 1302.3                 |
| 14    | 0.86             | 885.4        | 1130.1                 |
| 13    | 0.88             | 903.7        | 960.7                  |
| 12    | 0.90             | 921.9        | 794.2                  |
| 11    | 0.91             | 931.0        | 711.9                  |
| 10    | 0.92             | 940.2        | 630.3                  |
| 9     | 0.93             | 949.3        | 549.3                  |
| 8     | 0.94             | 958.4        | 469.0                  |
| 7     | 0.95             | 967.6        | 389.3                  |
| 6     | 0.96             | 676.7        | 310.3                  |
| 5     | 0.97             | 985.8        | 231.8                  |
| 4     | 0.98             | 995.0        | 154.0                  |

| Layer | Sigma Coordinate | Pressure(mb) | Height above ground(m) |
|-------|------------------|--------------|------------------------|
| 3     | 0.985            | 999.5        | 115.3                  |
| 2     | 0.990            | 1004.1       | 76.7                   |
| 1     | 0.995            | 1008.7       | 38.3                   |

CMAQ treats lead as an aerosol phase Hazardous Air Pollutant (HAP), occurring in Aitken, accumulation, and coarse mode. CMAQ computes and tracks aerosol HAPS components within particulate matter; thus, lead emissions are treated as chemically inert but undergo the same microphysical processes and deposition rates determined within the aerosol module. Non-lead emissions contributing to particulate matter concentrations, such as NO<sub>x</sub> and SO<sub>x</sub>, are not treated as chemically inert by the model. A shortcoming of this approach is that it does not include an aerosol mode representing ultrafine lead particles, which may undergo faster dispersion rates.<sup>1</sup>

## **Meteorology**

Model concentrations are simulated using year 2005 meteorological input data as taken from the Weather Research and Forecasting (WRF) v3.3.1 model.<sup>4</sup> The WRF meteorological data has been compared and validated against monitor data for temperature and wind speed for the CMAQ modeling domain for use in air quality modeling studies.<sup>5,6</sup> Year 2005 meteorology was selected because of the availability of an existing validated data set; and the use of 2005 meteorology has been justified for use in other air quality studies because the presence of summer stagnant air masses and clear skies is conducive to PM<sub>2.5</sub> and ozone formation.<sup>5</sup>

Year 2005 summer temperatures, particularly in the Northeast and Southwest, and precipitation, particularly in the Southeast and Central Plains, were above average for the United States. Fall temperatures for 2005 were significantly above average for much of the

US.<sup>7</sup> 2008 was on average cooler across the United States than in 2005. Precipitation in 2008 was variable, with periods of excessive rainfall in the Central Plains.<sup>7</sup>

**Table S2.** Parameterization of atmospheric lead (PbA [ $\mu\text{g}/\text{m}^3$ ]) to blood lead ([PbB ( $\mu\text{g}/\text{dL}$ )] Concentration Response Functions (CRFs). The concentration response functions used in this study are taken from literature sources that have differing population demographics, timescales, exposure levels, and geographic scopes. The CRFs are grouped into to functional forms: ln-ln and linear.

| Model Form | Model                 | $\beta$ | Notes                                                                                                                                                                                     |
|------------|-----------------------|---------|-------------------------------------------------------------------------------------------------------------------------------------------------------------------------------------------|
| Ln-ln      | Model 1 <sup>10</sup> | 0.076   | Based on NHANES III (1988-1994) national data and annual average TSP from the EPA Air Quality System, for children 1-5 yrs. <sup>27</sup>                                                 |
|            | Model 2 <sup>10</sup> | 0.140   | Based on NHANES 9908 (1999-2008) national data and annual average TSP from the EPA Air Quality System, for children 1-5 yrs. <sup>27</sup>                                                |
|            | Model 3 <sup>11</sup> | 0.3485  | Meta-analysis of 18 studies spanning 1970-1982, for a variety of countries, and children's ages. Model based on data for all children. <sup>34</sup>                                      |
|            | Model 4 <sup>11</sup> | 0.2159  | Meta-analysis of 18 studies spanning 1974-1982, for various countries, and children's ages. Model based on data for children with "low" PbB (<20 $\mu\text{g}/\text{dL}$ ). <sup>34</sup> |
|            | Model 5 <sup>12</sup> | 0.24    | Based on PbB data from Chicago, IL (1968-1988), with quarterly average PbA data from the IL EPA, for children 0.5-6 yrs. <sup>32</sup>                                                    |
| Linear     | Model 6 <sup>13</sup> | 7       | Based on PbB data from Trail, British Columbia (1991-2000), with quarterly average PbA data from the smelter company, for children 0.5-6 yrs. <sup>31</sup>                               |
|            | Model 7 <sup>14</sup> | 8.6     | Based on PbB data from Chicago, IL (1976-1980), with PbA estimated from gasoline usage, for children 0-5 yrs. <sup>33</sup>                                                               |
|            | Model 8 <sup>15</sup> | 3.6     | Based on PbB data from Mumbai, India (1984-1996), with 24-hr PbA data collected by the authors at residences of the study population, for children 6-10 yrs. <sup>30</sup>                |

The two air-to-blood CRF functional form groups behave differently at low concentrations ( $< 0.02 \mu\text{g}/\text{m}^3$ ) and higher concentrations of atmospheric lead. **Figure S3** shows the behavior of the 8 CRFs at low concentrations and **Figure S4** shows the behavior of the same CRFs at higher concentrations.

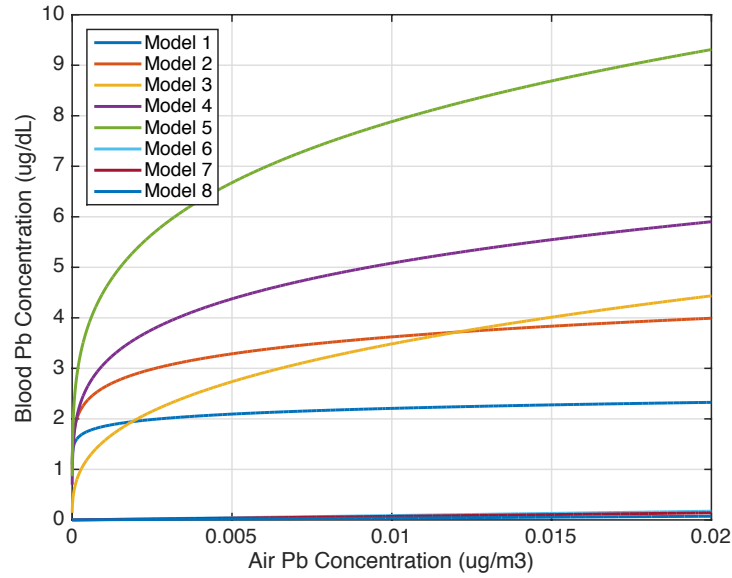

**Figure S3.** Air-to-blood Concentration Response functions over a range of low air lead concentrations.

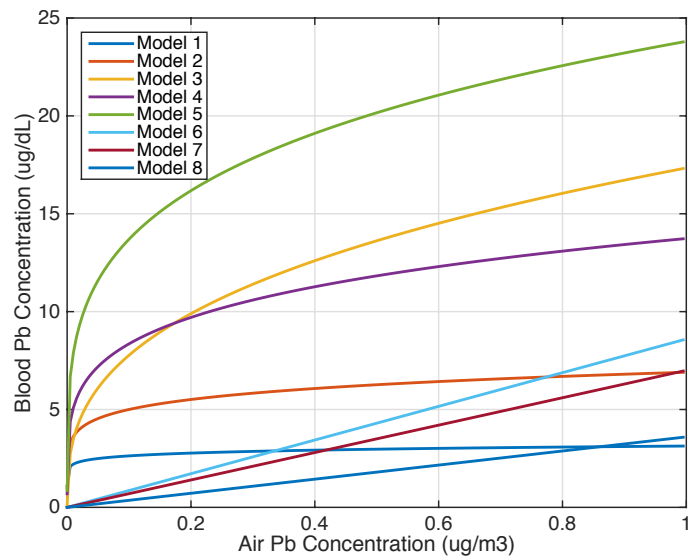

**Figure S4.** Air-to-blood Concentration Response functions over a larger range of air lead concentrations.



**Table S3.** Blood lead ([PbB ( $\mu\text{g/dL}$ )] to IQ loss concentration response functions.

| <b>Model</b>          | <b>Model Form</b>                                                                                 | <b>Equation</b>                                                                                                                                                                                                                             |
|-----------------------|---------------------------------------------------------------------------------------------------|---------------------------------------------------------------------------------------------------------------------------------------------------------------------------------------------------------------------------------------------|
| Model A <sup>16</sup> | <b>Log-linear with threshold</b>                                                                  | <i>For concurrent PbB &gt; 1 <math>\mu\text{g/dL}</math></i><br>$\Delta IQ = \ln(\text{PbB}) \cdot 2.65$<br><i>For concurrent PbB <math>\leq 1 \mu\text{g/dL}</math></i><br>$\Delta IQ = 0$                                                 |
| Model B <sup>16</sup> | <b>Log-linear with linearization at low exposure</b>                                              | <i>For concurrent PbB &gt; 1 <math>\mu\text{g/dL}</math></i><br>$\Delta IQ = \ln(\text{PbB}) \cdot 2.65 + 2.65$<br><i>For concurrent PbB <math>\leq 1 \mu\text{g/dL}</math></i><br>$\Delta IQ = \text{PbB} \cdot 2.65$                      |
| Model C <sup>16</sup> | <b>Dual linear with slope change at 5 <math>\mu\text{g/dL}</math></b><br>(“Dual linear – 10”)     | <i>For concurrent PbB &gt; 5 <math>\mu\text{g/dL}</math></i><br>$\Delta IQ = (\text{PbB} - 5) \cdot 0.13 + 5 \cdot 0.77$<br><i>For concurrent PbB <math>\leq 5 \mu\text{g/dL}</math></i><br>$\Delta IQ = \text{PbB} \cdot 0.77$             |
| Model D <sup>16</sup> | <b>Dual linear with slope change at 3.75 <math>\mu\text{g/dL}</math></b><br>(“Dual linear – 7.5”) | <i>For concurrent PbB &gt; 3.75 <math>\mu\text{g/dL}</math></i><br>$\Delta IQ = (\text{PbB} - 3.75) \cdot 0.15 + 2.53 \cdot 3.75$<br><i>For concurrent PbB <math>\leq 3.75 \mu\text{g/dL}</math></i><br>$\Delta IQ = \text{PbB} \cdot 2.53$ |

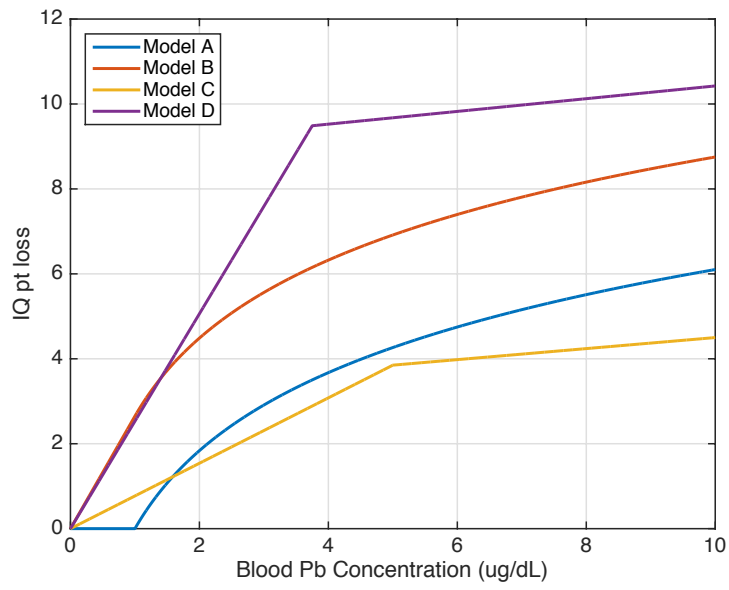

**Figure S5.** Blood-to-IQ CRFs for a range of blood lead levels.

## REFERENCES

- [1] *Calculating Piston-Engine Aircraft Airport Inventories for Lead for the 2008 National Emissions Inventory*. EPA-420-B-10-044. United States Environmental Protection Agency: Washington, DC, 2010; [www.epa.gov/otaq/regs/nonroad/aviation/420b10044.pdf](http://www.epa.gov/otaq/regs/nonroad/aviation/420b10044.pdf).
- [2] Wang, G. H.; Horn, R.J. Temporal patterns of aircraft operations at US Airports: A statistical analysis. *Transp. Res. Part A: Gen.* **1985**, *19* (4), pp.325-335.
- [3] Hutzell, W. T.; Luecken, D. J. Fate and transport of emissions for several trace metals over the United States. *Sci. Total Environ.* **2008**, *396* (2), 164-179. DOI 10.1016/j.scitotenv.2008.02.020.
- [4] Skamarock, W.C.; Klemp, J.B. A time-split nonhydrostatic atmospheric model for weather research and forecasting applications. *J. Comput. Phys.* **2008**, *227* (7), 3465-3485. DOI 10.1016/j.jcp.2007.01.037.
- [5] Yim, S. H.; Lee, G. L.; Lee, I. H.; Allroggen, F.; Ashok, A.; Caiazzo, F.; Eastham, S. D.; Malina, R. and Barrett, S.R. Global, regional and local health impacts of civil aviation emissions. *Environ. Res. Lett.* **2015**, *10* (3), 034001. DOI 10.1088/1748-9326/10/3/034001.
- [6] Caiazzo, F.; Ashok, A.; Waitz, I. A.; Yim, S. H.; Barrett, S. R. Air pollution and early deaths in the United States. Part I: Quantifying the impact of major sectors in 2005. *Atmos. Environ.* **2013**, *79*, 198-208. DOI 10.1016/j.atmosenv.2013.05.081.
- [7] Fann, N.; Fulcher, C. M.; & Baker, K. The recent and future health burden of air pollution apportioned across US sectors. *Environ, Sci. Technol.* **2013**, *47*(8), 3580-3589. DOI 10.1021/es304831q.
- [8] NOAA National Centers for Environmental Information, State of the Climate: Global Analysis for Annual 2005, published online January 2006, retrieved on July 24, 2016 from <http://www.ncdc.noaa.gov/sotc/global/200513>.
- [9] NOAA National Centers for Environmental Information, State of the Climate: National Overview for Annual 2008, published online January 2009, retrieved on July 24, 2016 from <http://www.ncdc.noaa.gov/sotc/national/200813>.
- [10] Richmond-Bryant, J.; Meng, Q.; Davis, A.; Cohen, J.; Lu, S. E.; Svendsgaard, D.; Brown, J. S.; Tuttle, L.; Hubbard, H.; Rice, J.; Kirrane, E. The Influence of declining air lead levels on blood lead–air lead slope factors in children. *Environ. Health Perspect.* **2014**, *122* (7), 754-760. DOI 10.1289/ehp.1307072.
- [11] Brunekreef, B. The relationship between air lead and blood lead in children: a critical review. *Sci. Tot. Environ.* **1984**, *38*, 79-123. DOI 10.1016/0048-9697(84)90210-9.

- [12] Hayes, E.B.; Orbach, H.G.; Fernandez, A.M.; Lyne, S.; Matte, T.D.; McElvaine, M.D. Long-term trends in blood lead levels among children in Chicago: relationship to air lead levels. *Pediatr.* **1994**, *93* (2), 195-200.
- [13] Hiltz, S.R. Effect of smelter emission reductions on children's blood lead levels. *Sci. Total Environ.* **2003**, *303* (1), 51-58. DOI 10.1016/S0048-9697(02)00357-1.
- [14] Schwartz, J.; Pitcher, H. The relationship between gasoline lead and blood lead in the United States. *J. Off. Stat.* **1989**, *5* (4), 421-431.
- [15] Tripathi, R. M.; Raghunath, R.; Kumar, A. V.; Sastry, V. N.; Sadasivan, S. Atmospheric and children's blood lead as indicators of vehicular traffic and other emission sources in Mumbai, India. *Sci. Total Environ.* **2001**, *267* (1), 101-108. DOI 10.1016/S0048-9697(00)00770-1.
- [16] *Lead: Human Exposure and Health Risk Assessments for Selected Case Studies - Volume I. Human Exposure and Health Risk Assessments - Full Scale Vol I.* EPA-452/R-07-014a. United States Environmental Protection Agency: Research Triangle Park, NC, 2007.
